# Supplementary material
Source: MDPI journal article supplement (https://www.mdpi.com/search?q=ijms-19-00500)
Supplement: s001 [file ijms-19-00500-s001.pdf]

SUPPLEMENTAL MATERIAL

Table S1 Subgroup analyses for left ventricular ejection fraction

| Rank | Metabolite   | T1                       |       |                          |       | T2                       |      |                          |       | rANOVA |               |
|------|--------------|--------------------------|-------|--------------------------|-------|--------------------------|------|--------------------------|-------|--------|---------------|
|      |              | Normal LVEF<br>(N=34)    |       | Reduced LVEF<br>(N=10)   |       | Normal LVEF<br>(N=34)    |      | Reduced LVEF<br>(N=10)   |       | FDR    | P-<br>Value   |
|      |              | Mean conc.<br>[ $\mu$ M] | SD    | Mean conc.<br>[ $\mu$ M] | SD    | Mean conc.<br>[ $\mu$ M] | SD   | Mean conc.<br>[ $\mu$ M] | SD    |        |               |
| 1    | C18          | 0.06                     | 0.02  | 0.05                     | 0.01  | 0.05                     | 0.01 | 0.05                     | 0.02  | 0.2275 | <b>0.0175</b> |
| 2    | C3           | 0.38                     | 0.16  | 0.39                     | 0.18  | 0.43                     | 0.21 | 0.41                     | 0.16  | 0.2672 | <b>0.0411</b> |
| 3    | C18:1        | 0.17                     | 0.05  | 0.18                     | 0.06  | 0.15                     | 0.05 | 0.15                     | 0.05  | 0.4169 | 0.0962        |
| 4    | C16          | 0.13                     | 0.03  | 0.12                     | 0.03  | 0.12                     | 0.03 | 0.11                     | 0.03  | 0.5551 | 0.1708        |
| 5    | C5           | 0.20                     | 0.27  | 0.22                     | 0.20  | 0.24                     | 0.28 | 0.57                     | 0.80  | 0.6065 | 0.2835        |
| 6    | C3.DC.-C4.OH | 0.07                     | 0.03  | 0.10                     | 0.06  | 0.06                     | 0.03 | 0.09                     | 0.08  | 0.6065 | 0.3095        |
| 7    | C14:1        | 0.11                     | 0.03  | 0.14                     | 0.06  | 0.11                     | 0.05 | 0.11                     | 0.04  | 0.6065 | 0.3266        |
| 8    | C2           | 9.21                     | 3.78  | 13.21                    | 7.07  | 8.49                     | 3.92 | 8.10                     | 3.20  | 0.6796 | 0.4182        |
| 9    | C4           | 0.30                     | 0.17  | 0.46                     | 0.22  | 0.34                     | 0.21 | 0.43                     | 0.19  | 0.693  | 0.5392        |
| 10   | C18:2        | 0.04                     | 0.01  | 0.05                     | 0.02  | 0.04                     | 0.02 | 0.04                     | 0.02  | 0.693  | 0.5789        |
| 11   | C0           | 36.69                    | 10.88 | 37.78                    | 13.04 | 35.89                    | 9.71 | 32.64                    | 11.19 | 0.693  | 0.6046        |
| 12   | C10          | 0.22                     | 0.07  | 0.28                     | 0.18  | 0.22                     | 0.09 | 0.22                     | 0.10  | 0.693  | 0.6538        |
| 13   | C14:2        | 0.03                     | 0.01  | 0.04                     | 0.02  | 0.03                     | 0.02 | 0.03                     | 0.01  | 0.693  | 0.693         |

conc. = concentration; FDR = false discovery rate; LVEF = left ventricular ejection fraction;  $\mu$ M = micromolar; SD = standard deviation

**Table S2 Subgroup analyses for renal function**

| Rank | Metabolite  | T1               |       | Creatinine < 1.2 |      | T2               |       | Creatinine < 1.2 |      | FDR    | P-Value       |
|------|-------------|------------------|-------|------------------|------|------------------|-------|------------------|------|--------|---------------|
|      |             | Creatinine > 1.2 |       | (N=30)           |      | Creatinine > 1.2 |       | (N=30)           |      |        |               |
|      |             | Mean conc. [μM]  | SD    | Mean conc. [μM]  | SD   | Mean conc. [μM]  | SD    | Mean conc. [μM]  | SD   |        |               |
| 1    | C18:1       | 0.19             | 0.06  | 0.16             | 0.04 | 0.16             | 0.06  | 0.14             | 0.05 | 0.1989 | <b>0.019</b>  |
| 2    | C14:1       | 0.13             | 0.05  | 0.11             | 0.04 | 0.12             | 0.05  | 0.10             | 0.04 | 0.1989 | <b>0.0306</b> |
| 3    | C16         | 0.14             | 0.04  | 0.12             | 0.03 | 0.12             | 0.03  | 0.11             | 0.03 | 0.2076 | <b>0.0479</b> |
| 4    | C5          | 0.34             | 0.35  | 0.15             | 0.16 | 0.52             | 0.72  | 0.22             | 0.25 | 0.4858 | 0.1498        |
| 5    | C3          | 0.46             | 0.18  | 0.35             | 0.14 | 0.48             | 0.21  | 0.40             | 0.18 | 0.4858 | 0.2317        |
| 6    | C2          | 13.95            | 6.81  | 8.34             | 2.30 | 9.94             | 4.41  | 7.68             | 3.19 | 0.4858 | 0.2946        |
| 7    | C18         | 0.06             | 0.02  | 0.05             | 0.01 | 0.05             | 0.02  | 0.05             | 0.01 | 0.4858 | 0.3026        |
| 8    | C10         | 0.27             | 0.16  | 0.21             | 0.07 | 0.26             | 0.09  | 0.21             | 0.08 | 0.4858 | 0.3206        |
| 9    | C14:2       | 0.04             | 0.02  | 0.03             | 0.01 | 0.04             | 0.02  | 0.03             | 0.01 | 0.4858 | 0.3363        |
| 10   | C18:2       | 0.05             | 0.02  | 0.04             | 0.01 | 0.04             | 0.02  | 0.04             | 0.02 | 0.5025 | 0.3865        |
| 11   | C3.DC-C4.OH | 0.09             | 0.04  | 0.07             | 0.04 | 0.07             | 0.03  | 0.07             | 0.06 | 0.5282 | 0.4469        |
| 12   | C4          | 0.50             | 0.18  | 0.26             | 0.15 | 0.48             | 0.22  | 0.30             | 0.18 | 0.6433 | 0.5938        |
| 13   | C0          | 41.99            | 13.97 | 34.58            | 9.10 | 34.93            | 11.38 | 35.25            | 9.52 | 0.7167 | 0.7167        |

conc. = concentration, FDR = false discovery rate, μM = micromolar, SD = standard deviation

**Table S3 Subgroup analyses for NT-proBNP levels**

| Rank | Metabolite      | T1                      |       |                         |       | T2                      |       |                         |      | rANOVA |               |
|------|-----------------|-------------------------|-------|-------------------------|-------|-------------------------|-------|-------------------------|------|--------|---------------|
|      |                 | proBNP > 1038<br>(N=21) |       | proBNP < 1038<br>(N=23) |       | proBNP > 1038<br>(N=21) |       | proBNP < 1038<br>(N=23) |      | FDR    | P-<br>Value   |
|      |                 | Mean conc.<br>[µM]      | SD    | Mean conc.<br>[µM]      | SD    | Mean conc.<br>[µM]      | SD    | Mean conc.<br>[µM]      | SD   |        |               |
| 1    | C5              | 0.18                    | 0.19  | 0.23                    | 0.30  | 0.34                    | 0.61  | 0.29                    | 0.31 | 0.1677 | <b>0.0129</b> |
| 2    | C16             | 0.13                    | 0.03  | 0.12                    | 0.03  | 0.12                    | 0.03  | 0.11                    | 0.03 | 0.2431 | <b>0.0374</b> |
| 3    | C18             | 0.05                    | 0.02  | 0.05                    | 0.01  | 0.05                    | 0.02  | 0.05                    | 0.01 | 0.2974 | 0.0788        |
| 4    | C18:1           | 0.17                    | 0.04  | 0.17                    | 0.06  | 0.16                    | 0.05  | 0.14                    | 0.05 | 0.2974 | 0.0915        |
| 5    | C10             | 0.26                    | 0.14  | 0.20                    | 0.07  | 0.25                    | 0.10  | 0.20                    | 0.07 | 0.3948 | 0.1614        |
| 6    | C18:2           | 0.04                    | 0.02  | 0.04                    | 0.01  | 0.04                    | 0.02  | 0.04                    | 0.02 | 0.3948 | 0.2071        |
| 7    | C2              | 9.85                    | 5.44  | 10.37                   | 4.60  | 8.67                    | 3.73  | 8.16                    | 3.79 | 0.3948 | 0.2359        |
| 8    | C14:1           | 0.12                    | 0.05  | 0.11                    | 0.04  | 0.12                    | 0.05  | 0.10                    | 0.04 | 0.3948 | 0.2447        |
| 9    | C14:2           | 0.04                    | 0.02  | 0.03                    | 0.01  | 0.03                    | 0.02  | 0.03                    | 0.01 | 0.3948 | 0.2733        |
| 10   | C4              | 0.33                    | 0.16  | 0.35                    | 0.22  | 0.38                    | 0.22  | 0.34                    | 0.20 | 0.4337 | 0.3446        |
| 11   | C3.DC-<br>C4.OH | 0.08                    | 0.05  | 0.07                    | 0.03  | 0.08                    | 0.06  | 0.07                    | 0.03 | 0.4337 | 0.367         |
| 12   | C3              | 0.35                    | 0.14  | 0.42                    | 0.18  | 0.43                    | 0.21  | 0.42                    | 0.19 | 0.4923 | 0.4544        |
| 13   | C0              | 33.27                   | 10.68 | 40.28                   | 11.04 | 33.50                   | 10.42 | 36.65                   | 9.67 | 0.59   | 0.59          |

BNP = brain natriuretic peptide, conc. = concentration, FDR = false discovery rate, µM = micromolar, SD = standard deviation

**Table S4 Subgroup analyses for diabetes mellitus**

| Rank | Metabolite  | T1                    |       |                       |      | T2                    |       |                       |      | FDR    | P-Value       |
|------|-------------|-----------------------|-------|-----------------------|------|-----------------------|-------|-----------------------|------|--------|---------------|
|      |             | Diabetes (N=16)       |       | No Diabetes (N=28)    |      | Diabetes (N=16)       |       | No Diabetes (N=28)    |      |        |               |
|      |             | Mean conc. [ $\mu$ M] | SD    | Mean conc. [ $\mu$ M] | SD   | Mean conc. [ $\mu$ M] | SD    | Mean conc. [ $\mu$ M] | SD   |        |               |
| 1    | C0          | 37.55                 | 14.55 | 36.58                 | 9.15 | 36.58                 | 11.28 | 34.41                 | 9.43 | 0.0351 | <b>0.0027</b> |
| 2    | C18:1       | 0.17                  | 0.05  | 0.17                  | 0.05 | 0.16                  | 0.06  | 0.14                  | 0.05 | 0.1242 | <b>0.0325</b> |
| 3    | C18:2       | 0.04                  | 0.01  | 0.04                  | 0.01 | 0.04                  | 0.02  | 0.04                  | 0.01 | 0.1242 | <b>0.0368</b> |
| 4    | C16         | 0.13                  | 0.04  | 0.12                  | 0.03 | 0.12                  | 0.03  | 0.11                  | 0.03 | 0.1242 | <b>0.0382</b> |
| 5    | C2          | 11.72                 | 6.31  | 9.21                  | 3.83 | 10.03                 | 4.63  | 7.56                  | 2.90 | 0.1685 | 0.0648        |
| 6    | C5          | 0.31                  | 0.35  | 0.15                  | 0.14 | 0.41                  | 0.40  | 0.26                  | 0.51 | 0.4621 | 0.2398        |
| 7    | C3.DC-C4.OH | 0.08                  | 0.04  | 0.07                  | 0.05 | 0.08                  | 0.04  | 0.07                  | 0.06 | 0.4621 | 0.2488        |
| 8    | C14:1       | 0.12                  | 0.04  | 0.12                  | 0.04 | 0.12                  | 0.05  | 0.10                  | 0.04 | 0.4815 | 0.2963        |
| 9    | C3          | 0.45                  | 0.20  | 0.35                  | 0.13 | 0.54                  | 0.24  | 0.36                  | 0.14 | 0.5357 | 0.3971        |
| 10   | C18         | 0.05                  | 0.02  | 0.05                  | 0.01 | 0.05                  | 0.01  | 0.05                  | 0.01 | 0.5357 | 0.4428        |
| 11   | C4          | 0.41                  | 0.20  | 0.30                  | 0.18 | 0.47                  | 0.25  | 0.30                  | 0.16 | 0.5357 | 0.5107        |
| 12   | C14:2       | 0.03                  | 0.02  | 0.03                  | 0.01 | 0.04                  | 0.02  | 0.03                  | 0.01 | 0.5357 | 0.5225        |
| 13   | C10         | 0.24                  | 0.16  | 0.23                  | 0.07 | 0.24                  | 0.09  | 0.22                  | 0.09 | 0.5357 | 0.5357        |

conc. = concentration, FDR = false discovery rate,  $\mu$ M = micromolar, SD = standard deviation
